# Supplementary material for: Synthesis, crystal structures and magnetic properties of a family of manganese phosphonate clusters with diverse structures
Source: Royal Society of Chemistry journal article supplement (doi:10.1039/c5ce01471a), 2015-01-01
Supplement: c5ce01471a1.pdf [file c5ce01471a1.pdf]

## Supporting Information

# Synthesis, crystal structures and magnetic properties of a family of manganese phosphonate clusters with diverse structures

Jin-Ying Liu, Cheng-Bing Ma, Hui Chen, Chang-Neng Chen\*

**Table S1. Selected bond lengths (Å) and angles (deg) for cluster 2**

|                     |            |                     |           |
|---------------------|------------|---------------------|-----------|
| Mn(1)–O(1) #2       | 1.860(3)   | Mn(2)–O(5) #3       | 1.861(4)  |
| Mn(1)–O(1)          | 1.860(3)   | Mn(2)–O(5) #4       | 1.861(4)  |
| Mn(1)–O(3)          | 1.871(3)   | Mn(2)–O(5) #5       | 1.861(4)  |
| Mn(1)–O(3) #3       | 1.871(3)   | Mn(2)–O(5)          | 1.861(4)  |
| Mn(1)–O(2)          | 2.181(5)   | Mn(2)–O(4)          | 2.201(7)  |
| O(1)-Mn(1)-O(1)#2   | 90.5(3)    | O(5)-Mn(2)-O(5)#3   | 177.4(2)  |
| O(1)-Mn(1)-O(3)#2   | 89.5(2)    | O(5)-Mn(2)-O(5)#4   | 89.970(6) |
| O(1)#2-Mn(1)-O(3)#2 | 177.17(17) | O(5)#3-Mn(2)-O(5)#4 | 89.970(6) |
| O(1)-Mn(1)-O(3)     | 177.17(17) | O(5)-Mn(2)-O(5)#5   | 89.970(6) |
| O(1)#2-Mn(1)-O(3)   | 89.5(2)    | O(5)#3-Mn(2)-O(5)#5 | 89.970(6) |
| O(3)#2-Mn(1)-O(3)   | 90.4(3)    | O(5)#4-Mn(2)-O(5)#5 | 177.4(2)  |
| O(1)-Mn(1)-O(2)     | 90.72(15)  | O(5)-Mn(2)-O(4)     | 91.30(12) |
| O(1)#2-Mn(1)-O(2)   | 90.72(15)  | O(5)#3-Mn(2)-O(4)   | 91.30(12) |
| O(3)#2-Mn(1)-O(2)   | 92.11(15)  | O(5)#4-Mn(2)-O(4)   | 91.30(12) |
| O(3)-Mn(1)-O(2)     | 92.11(15)  | O(5)#5-Mn(2)-O(4)   | 91.30(12) |

Symmetry transformations used to generate equivalent atoms: #1 -y+1,x+1,-z #2 x,y,-z #3 y-1,-x+1,z  
#4 -y+1,x+1,z #5 -x,-y+2,z #6 y-1,-x+1,-z

**Table S2. Selected bond lengths (Å) and angles (deg) for cluster 3**

|            |          |              |          |
|------------|----------|--------------|----------|
| O(1)-Mn(1) | 1.910(3) | O(35)-Mn(9)  | 2.223(4) |
| O(2)-Mn(2) | 1.913(3) | O(35)-Mn(13) | 2.253(3) |

|               |          |                |          |
|---------------|----------|----------------|----------|
| O(3)-Mn(7)    | 1.891(3) | O(36)-Mn(10)   | 1.925(3) |
| O(4)-Mn(1)    | 2.228(3) | O(36)-Mn(9)    | 1.932(3) |
| O(4)-Mn(2)    | 2.242(3) | O(37)-Mn(11)   | 1.923(3) |
| O(5)-Mn(6)    | 1.874(4) | O(37)-Mn(9)    | 1.961(3) |
| O(6)-Mn(2)    | 1.939(3) | O(37)-Mn(8)    | 2.000(3) |
| O(6)-Mn(1)    | 1.953(3) | O(37)-Mn(10)   | 2.286(3) |
| O(6)-Mn(3)    | 1.953(3) | O(38)-Mn(11)   | 1.918(3) |
| O(7)-Mn(2)    | 1.947(3) | O(38)-Mn(13)#2 | 1.973(3) |
| O(7)-Mn(4)    | 1.950(3) | O(38)-Mn(8)    | 1.975(3) |
| O(7)-Mn(3)    | 1.954(3) | O(39)-Mn(11)   | 2.208(3) |
| O(8)-Mn(2)    | 1.913(3) | O(39)-Mn(9)    | 2.241(4) |
| O(9)-Mn(4)    | 2.234(3) | O(40)-Mn(9)    | 1.895(3) |
| O(9)-Mn(2)    | 2.263(3) | O(40)-Mn(13)   | 1.925(3) |
| O(10)-Mn(6)   | 1.899(4) | O(40)-Mn(8)    | 2.279(3) |
| O(11)-Mn(6)   | 1.873(4) | O(40)-Mn(14)   | 2.316(3) |
| O(12)-Mn(6)   | 2.239(5) | O(41)-Mn(9)    | 1.934(3) |
| O(13)-Mn(1)#1 | 2.227(4) | O(42)-Mn(13)   | 1.916(3) |
| O(13)-Mn(4)   | 2.231(3) | O(43)-Mn(13)   | 1.904(4) |
| O(14)-Mn(4)   | 1.911(4) | O(44)-Mn(14)   | 1.940(4) |
| O(14)-Mn(5)   | 2.017(4) | O(45)-Mn(14)   | 2.411(5) |
| O(15)-Mn(4)   | 1.916(3) | O(46)-Mn(14)   | 1.943(4) |
| O(15)-Mn(1)#1 | 1.937(3) | O(46)-Mn(12)   | 1.954(4) |
| O(15)-Mn(5)   | 1.941(3) | O(47)-Mn(14)   | 1.871(4) |
| O(15)-Mn(3)   | 2.444(3) | O(48)-Mn(12)   | 1.869(4) |
| O(16)-Mn(5)   | 2.006(4) | O(50)-Mn(12)   | 1.900(4) |
| O(17)-Mn(5)   | 1.930(4) | O(52)-Mn(4)    | 1.919(3) |
| O(20)-Mn(5)   | 2.115(4) | O(53)-Mn(12)   | 2.205(5) |
| O(21)-Mn(7)#1 | 1.874(4) | Mn(1)-O(15)#1  | 1.937(3) |
| O(22)-Mn(7)   | 1.874(4) | Mn(1)-O(13)#1  | 2.227(4) |
| O(23)-Mn(7)   | 1.922(4) | Mn(3)-O(7)#1   | 1.954(3) |
| O(23)-Mn(6)#1 | 1.929(4) | Mn(3)-O(6)#1   | 1.953(3) |
| O(24)-Mn(7)   | 2.220(5) | Mn(3)-O(15)#1  | 2.444(3) |
| O(25)-Mn(1)   | 1.900(4) | Mn(5)-O(25)#1  | 2.072(4) |
| O(25)-Mn(5)#1 | 2.072(4) | Mn(6)-O(23)#1  | 1.929(4) |

|                       |            |                       |            |
|-----------------------|------------|-----------------------|------------|
| O(28)-Mn(10)          | 1.934(4)   | Mn(7)-O(21)#1         | 1.874(4)   |
| O(29)-Mn(14)#2        | 1.880(4)   | Mn(8)-O(38)#2         | 1.975(3)   |
| O(30)-Mn(11)          | 2.202(3)   | Mn(8)-O(37)#2         | 2.000(3)   |
| O(30)-Mn(13)#2        | 2.234(3)   | Mn(8)-O(40)#2         | 2.279(3)   |
| O(31)-Mn(10)          | 1.925(4)   | Mn(12)-O(34)#2        | 1.856(4)   |
| O(31)-Mn(11)          | 1.952(4)   | Mn(13)-O(38)#2        | 1.973(3)   |
| O(32)-Mn(10)          | 2.160(4)   | Mn(13)-O(30)#2        | 2.234(3)   |
| O(33)-Mn(10)          | 1.897(4)   | Mn(14)-O(29)#2        | 1.880(4)   |
| O(34)-Mn(12)#2        | 1.856(4)   | O(14)-Mn(4)-O(9)      | 91.89(15)  |
| O(25)-Mn(1)-O(15)#1   | 83.78(16)  | O(15)-Mn(4)-O(9)      | 85.17(13)  |
| O(1)-Mn(1)-O(15)#1    | 178.87(15) | O(52)-Mn(4)-O(9)      | 93.69(14)  |
| O(25)-Mn(1)-O(6)      | 169.29(16) | O(7)-Mn(4)-O(9)       | 82.86(12)  |
| O(1)-Mn(1)-O(6)       | 93.94(14)  | O(13)-Mn(4)-O(9)      | 167.16(13) |
| O(15)#1-Mn(1)-O(6)    | 86.76(13)  | O(17)-Mn(5)-O(15)     | 170.06(17) |
| O(25)-Mn(1)-O(4)      | 91.97(16)  | O(17)-Mn(5)-O(16)     | 94.03(17)  |
| O(1)-Mn(1)-O(4)       | 94.25(14)  | O(15)-Mn(5)-O(16)     | 92.34(15)  |
| O(15)#1-Mn(1)-O(4)    | 84.96(13)  | O(17)-Mn(5)-O(14)     | 94.46(16)  |
| O(6)-Mn(1)-O(4)       | 82.21(13)  | O(15)-Mn(5)-O(14)     | 79.37(14)  |
| O(25)-Mn(1)-O(13)#1   | 90.10(16)  | O(16)-Mn(5)-O(14)     | 171.45(15) |
| O(1)-Mn(1)-O(13)#1    | 98.76(14)  | O(17)-Mn(5)-O(25)#1   | 93.22(16)  |
| O(15)#1-Mn(1)-O(13)#1 | 82.08(13)  | O(15)-Mn(5)-O(25)#1   | 79.30(14)  |
| O(6)-Mn(1)-O(13)#1    | 93.55(13)  | O(16)-Mn(5)-O(25)#1   | 88.76(17)  |
| O(4)-Mn(1)-O(13)#1    | 166.58(13) | O(14)-Mn(5)-O(25)#1   | 91.76(16)  |
| O(8)-Mn(2)-O(2)       | 88.48(15)  | O(17)-Mn(5)-O(20)     | 92.69(15)  |
| O(8)-Mn(2)-O(6)       | 177.21(14) | O(15)-Mn(5)-O(20)     | 94.73(13)  |
| O(2)-Mn(2)-O(6)       | 94.23(14)  | O(16)-Mn(5)-O(20)     | 91.72(16)  |
| O(8)-Mn(2)-O(7)       | 93.81(14)  | O(14)-Mn(5)-O(20)     | 86.89(15)  |
| O(2)-Mn(2)-O(7)       | 177.50(14) | O(25)#1-Mn(5)-O(20)   | 174.03(14) |
| O(6)-Mn(2)-O(7)       | 83.48(13)  | O(37)#2-Mn(8)-O(40)#2 | 74.99(12)  |
| O(8)-Mn(2)-O(4)       | 98.60(14)  | O(40)-Mn(8)-O(40)#2   | 180.0(2)   |
| O(2)-Mn(2)-O(4)       | 88.46(14)  | O(11)-Mn(6)-O(5)      | 175.37(18) |
| O(6)-Mn(2)-O(4)       | 82.13(13)  | O(11)-Mn(6)-O(10)     | 88.77(16)  |
| O(7)-Mn(2)-O(4)       | 90.23(13)  | O(5)-Mn(6)-O(10)      | 93.56(17)  |
| O(8)-Mn(2)-O(9)       | 89.47(14)  | O(11)-Mn(6)-O(23)#1   | 90.80(16)  |

|                      |            |                       |            |
|----------------------|------------|-----------------------|------------|
| O(2)-Mn(2)-O(9)      | 98.83(14)  | O(5)-Mn(6)-O(23)#1    | 87.31(17)  |
| O(6)-Mn(2)-O(9)      | 89.48(13)  | O(10)-Mn(6)-O(23)#1   | 173.89(17) |
| O(7)-Mn(2)-O(9)      | 82.18(12)  | O(11)-Mn(6)-O(12)     | 88.38(18)  |
| O(4)-Mn(2)-O(9)      | 169.30(12) | O(5)-Mn(6)-O(12)      | 87.56(18)  |
| O(7)#1-Mn(3)-O(7)    | 180.0      | O(10)-Mn(6)-O(12)     | 91.56(19)  |
| O(7)#1-Mn(3)-O(6)#1  | 82.92(12)  | O(23)#1-Mn(6)-O(12)   | 94.5(2)    |
| O(7)-Mn(3)-O(6)#1    | 97.08(12)  | O(21)#1-Mn(7)-O(22)   | 175.75(18) |
| O(7)#1-Mn(3)-O(6)    | 97.08(12)  | O(21)#1-Mn(7)-O(3)    | 88.77(15)  |
| O(7)-Mn(3)-O(6)      | 82.92(12)  | O(22)-Mn(7)-O(3)      | 92.95(16)  |
| O(6)#1-Mn(3)-O(6)    | 180.000(1) | O(21)#1-Mn(7)-O(23)   | 90.43(15)  |
| O(7)#1-Mn(3)-O(15)#1 | 73.86(12)  | O(22)-Mn(7)-O(23)     | 88.28(16)  |
| O(7)-Mn(3)-O(15)#1   | 106.14(12) | O(3)-Mn(7)-O(23)      | 173.71(17) |
| O(6)#1-Mn(3)-O(15)#1 | 106.10(12) | O(21)#1-Mn(7)-O(24)   | 88.23(18)  |
| O(6)-Mn(3)-O(15)#1   | 73.90(12)  | O(22)-Mn(7)-O(24)     | 87.82(18)  |
| O(7)#1-Mn(3)-O(15)   | 106.14(12) | O(3)-Mn(7)-O(24)      | 92.39(18)  |
| O(7)-Mn(3)-O(15)     | 73.86(12)  | O(23)-Mn(7)-O(24)     | 93.83(19)  |
| O(6)#1-Mn(3)-O(15)   | 73.90(12)  | O(38)-Mn(8)-O(38)#2   | 180.0(3)   |
| O(6)-Mn(3)-O(15)     | 106.10(12) | O(38)-Mn(8)-O(37)     | 79.55(13)  |
| O(15)#1-Mn(3)-O(15)  | 180.000(1) | O(38)#2-Mn(8)-O(37)   | 100.45(13) |
| O(14)-Mn(4)-O(15)    | 82.69(15)  | O(38)-Mn(8)-O(37)#2   | 100.45(13) |
| O(14)-Mn(4)-O(52)    | 96.29(15)  | O(38)#2-Mn(8)-O(37)#2 | 79.55(13)  |
| O(15)-Mn(4)-O(52)    | 178.44(15) | O(37)-Mn(8)-O(37)#2   | 180.00(19) |
| O(14)-Mn(4)-O(7)     | 169.16(15) | O(38)-Mn(8)-O(40)     | 101.54(12) |
| O(15)-Mn(4)-O(7)     | 87.41(13)  | O(38)#2-Mn(8)-O(40)   | 78.46(12)  |
| O(52)-Mn(4)-O(7)     | 93.51(14)  | O(37)-Mn(8)-O(40)     | 74.99(12)  |
| O(14)-Mn(4)-O(13)    | 89.82(15)  | O(37)#2-Mn(8)-O(40)   | 105.01(12) |
| O(15)-Mn(4)-O(13)    | 82.43(13)  | O(38)-Mn(8)-O(40)#2   | 78.46(12)  |
| O(52)-Mn(4)-O(13)    | 98.77(14)  | O(38)#2-Mn(8)-O(40)#2 | 101.54(12) |
| O(7)-Mn(4)-O(13)     | 93.26(13)  | O(37)-Mn(8)-O(40)#2   | 105.01(12) |
| O(40)-Mn(9)-O(36)    | 170.62(14) | O(37)#2-Mn(8)-O(40)#2 | 74.99(12)  |
| O(40)-Mn(9)-O(41)    | 91.01(14)  | O(40)-Mn(8)-O(40)#2   | 180.0(2)   |
| O(36)-Mn(9)-O(41)    | 97.44(15)  | O(51)-Mn(11)-O(38)    | 94.56(15)  |
| O(40)-Mn(9)-O(37)    | 85.35(13)  | O(51)-Mn(11)-O(37)    | 177.40(16) |
| O(36)-Mn(9)-O(37)    | 85.92(14)  | O(38)-Mn(11)-O(37)    | 82.92(14)  |

|                      |            |                        |            |
|----------------------|------------|------------------------|------------|
| O(41)-Mn(9)-O(37)    | 174.44(15) | O(51)-Mn(11)-O(31)     | 94.94(16)  |
| O(40)-Mn(9)-O(35)    | 87.29(13)  | O(38)-Mn(11)-O(31)     | 166.80(16) |
| O(36)-Mn(9)-O(35)    | 88.52(16)  | O(37)-Mn(11)-O(31)     | 87.65(15)  |
| O(41)-Mn(9)-O(35)    | 90.72(15)  | O(51)-Mn(11)-O(30)     | 91.25(15)  |
| O(37)-Mn(9)-O(35)    | 84.93(13)  | O(38)-Mn(11)-O(30)     | 84.52(13)  |
| O(40)-Mn(9)-O(39)    | 95.74(14)  | O(37)-Mn(11)-O(30)     | 89.19(13)  |
| O(36)-Mn(9)-O(39)    | 86.28(16)  | O(31)-Mn(11)-O(30)     | 86.13(14)  |
| O(41)-Mn(9)-O(39)    | 103.60(15) | O(51)-Mn(11)-O(39)     | 97.13(15)  |
| O(37)-Mn(9)-O(39)    | 80.98(13)  | O(38)-Mn(11)-O(39)     | 99.44(14)  |
| O(35)-Mn(9)-O(39)    | 165.28(13) | O(37)-Mn(11)-O(39)     | 82.66(13)  |
| O(33)-Mn(10)-O(31)   | 172.28(17) | O(31)-Mn(11)-O(39)     | 88.45(15)  |
| O(33)-Mn(10)-O(36)   | 90.46(18)  | O(30)-Mn(11)-O(39)     | 170.39(14) |
| O(31)-Mn(10)-O(36)   | 89.13(17)  | O(34)#2-Mn(12)-O(53)   | 85.6(2)    |
| O(33)-Mn(10)-O(28)   | 90.48(18)  | O(48)-Mn(12)-O(53)     | 87.9(2)    |
| O(31)-Mn(10)-O(28)   | 88.49(17)  | O(50)-Mn(12)-O(53)     | 91.9(2)    |
| O(36)-Mn(10)-O(28)   | 169.14(15) | O(46)-Mn(12)-O(53)     | 96.6(2)    |
| O(33)-Mn(10)-O(32)   | 93.10(19)  | O(43)-Mn(13)-O(42)     | 89.35(15)  |
| O(31)-Mn(10)-O(32)   | 94.60(18)  | O(43)-Mn(13)-O(40)     | 175.66(16) |
| O(36)-Mn(10)-O(32)   | 97.59(16)  | O(42)-Mn(13)-O(40)     | 91.10(15)  |
| O(28)-Mn(10)-O(32)   | 93.16(16)  | O(43)-Mn(13)-O(38)#2   | 92.27(14)  |
| O(33)-Mn(10)-O(37)   | 93.72(15)  | O(42)-Mn(13)-O(38)#2   | 174.20(15) |
| O(31)-Mn(10)-O(37)   | 78.67(14)  | O(40)-Mn(13)-O(38)#2   | 87.70(13)  |
| O(36)-Mn(10)-O(37)   | 77.58(13)  | O(43)-Mn(13)-O(30)#2   | 89.50(15)  |
| O(28)-Mn(10)-O(37)   | 91.57(13)  | O(42)-Mn(13)-O(30)#2   | 103.18(14) |
| O(32)-Mn(10)-O(37)   | 171.67(16) | O(40)-Mn(13)-O(30)#2   | 86.20(13)  |
| O(34)#2-Mn(12)-O(48) | 173.43(19) | O(38)#2-Mn(13)-O(30)#2 | 82.41(12)  |
| O(34)#2-Mn(12)-O(50) | 92.09(19)  | O(43)-Mn(13)-O(35)     | 98.60(15)  |
| O(48)-Mn(12)-O(50)   | 88.90(18)  | O(42)-Mn(13)-O(35)     | 89.14(14)  |
| O(34)#2-Mn(12)-O(46) | 89.26(18)  | O(40)-Mn(13)-O(35)     | 85.72(14)  |
| O(48)-Mn(12)-O(46)   | 90.72(17)  | O(38)#2-Mn(13)-O(35)   | 85.11(13)  |
| O(50)-Mn(12)-O(46)   | 171.49(17) | O(30)#2-Mn(13)-O(35)   | 165.38(12) |

Symmetry transformations used to generate equivalent atoms: #1 -x+1,-y+1,-z+1

**Table S3. Selected Bond Lengths (Å) and Angles (deg) for Cluster 4**

|                  |            |                     |            |
|------------------|------------|---------------------|------------|
| K(1)-O(13)       | 2.714(8)   | Mn(3)-O(4)          | 1.937(4)   |
| K(1)-O(18)       | 2.731(5)   | Mn(3)-O(20)         | 2.182(4)   |
| K(1)-O(12)       | 2.739(11)  | Mn(3)-O(8)          | 2.186(5)   |
| K(1)-O(26)       | 2.821(5)   | Mn(3)-Mn(7)         | 2.9131(16) |
| K(1)-O(21)       | 2.842(5)   | Mn(3)-Mn(6)         | 3.1077(16) |
| K(1)-O(12')      | 2.85(3)    | Mn(3)-Mn(4)         | 3.1642(18) |
| K(1)-O(33)       | 2.86(6)    | Mn(3)-Mn(1)#1       | 3.18(2)    |
| K(1)-Mn(5)       | 3.458(2)   | Mn(4)-O(2)#1        | 1.856(4)   |
| Mn(1)-O(1)       | 2.18(2)    | Mn(4)-O(23)#1       | 1.928(4)   |
| Mn(1)-O(3)#1     | 2.23(2)    | Mn(4)-O(16)         | 1.931(4)   |
| Mn(1)-O(1)#1     | 2.30(2)    | Mn(4)-O(1)          | 2.001(4)   |
| Mn(1)-O(4)#1     | 2.31(2)    | Mn(4)-O(29)         | 2.198(5)   |
| Mn(1)-O(3)       | 2.33(2)    | Mn(4)-O(8)          | 2.341(5)   |
| Mn(1)-O(4)       | 2.511(19)  | Mn(5)-O(2)          | 1.857(4)   |
| Mn(1)-Mn(3)#1    | 3.18(2)    | Mn(5)-O(21)         | 1.940(4)   |
| Mn(1)-Mn(6)      | 3.19(2)    | Mn(5)-O(26)         | 1.946(4)   |
| Mn(1)-Mn(6)#1    | 3.20(2)    | Mn(5)-O(3)          | 1.967(4)   |
| Mn(2)-O(11)      | 1.872(5)   | Mn(5)-O(18)         | 2.159(5)   |
| Mn(2)-O(3)       | 1.928(4)   | Mn(5)-O(7)#1        | 2.443(6)   |
| Mn(2)-O(25)      | 1.933(4)   | Mn(6)-O(15)         | 1.894(4)   |
| Mn(2)-O(4)#1     | 1.956(4)   | Mn(6)-O(24)         | 1.896(4)   |
| Mn(2)-O(28)      | 2.205(4)   | Mn(6)-O(1)          | 1.949(4)   |
| Mn(2)-O(7)#1     | 2.224(5)   | Mn(6)-O(3)          | 1.951(4)   |
| Mn(2)-Mn(7)#1    | 2.9422(15) | Mn(6)-O(20)         | 2.242(4)   |
| Mn(2)-Mn(6)      | 3.1087(15) | Mn(6)-O(28)         | 2.247(4)   |
| Mn(2)-Mn(5)      | 3.1378(18) | Mn(6)-Mn(1)#1       | 3.20(2)    |
| Mn(3)-O(6)       | 1.883(4)   | Mn(7)-O(10)         | 1.901(5)   |
| Mn(3)-O(17)      | 1.911(5)   | Mn(7)-O(4)          | 1.967(4)   |
| Mn(3)-O(1)       | 1.918(4)   | Mn(7)-O(6)          | 1.972(4)   |
| Mn(3)-O(4)       | 1.937(4)   | Mn(7)-O(27)#1       | 1.979(5)   |
| Mn(3)-O(20)      | 2.182(4)   | Mn(7)-O(11)#1       | 2.082(5)   |
| Mn(3)-O(8)       | 2.186(5)   | Mn(7)-O(19)         | 2.107(5)   |
| Mn(2)-O(7)#1     | 2.224(5)   | Mn(7)-Mn(2)#1       | 2.9422(15) |
| Mn(2)-Mn(7)#1    | 2.9422(15) | Mn(8)-O(22)         | 2.154(5)   |
| Mn(2)-Mn(6)      | 3.1087(15) | Mn(8)-O(5)          | 2.160(5)   |
| Mn(2)-Mn(5)      | 3.1378(18) | Mn(8)-O(19)         | 2.213(5)   |
| Mn(3)-O(6)       | 1.883(4)   | Mn(8)-O(2)          | 2.215(4)   |
| Mn(3)-O(17)      | 1.911(5)   | Mn(8)-O(27)#1       | 2.366(5)   |
| Mn(3)-O(1)       | 1.918(4)   | Mn(8)-O(29)#1       | 2.446(6)   |
| O(13)-K(1)-O(18) | 82.98(19)  | O(23)#1-Mn(4)-O(1)  | 163.54(19) |
| O(13)-K(1)-O(12) | 99.7(3)    | O(16)-Mn(4)-O(1)    | 91.20(17)  |
| O(18)-K(1)-O(12) | 141.4(3)   | O(2)#1-Mn(4)-O(29)  | 85.0(2)    |
| O(13)-K(1)-O(26) | 137.25(18) | O(23)#1-Mn(4)-O(29) | 91.24(19)  |

|                     |            |                     |            |
|---------------------|------------|---------------------|------------|
| O(18)-K(1)-O(26)    | 61.23(14)  | O(16)-Mn(4)-O(29)   | 91.9(2)    |
| O(12)-K(1)-O(26)    | 122.7(3)   | O(1)-Mn(4)-O(29)    | 105.15(18) |
| O(13)-K(1)-O(21)    | 87.04(19)  | O(2)#1-Mn(4)-O(8)   | 99.49(19)  |
| O(18)-K(1)-O(21)    | 63.47(13)  | O(23)#1-Mn(4)-O(8)  | 85.92(19)  |
| O(12)-K(1)-O(21)    | 154.6(4)   | O(16)-Mn(4)-O(8)    | 83.7(2)    |
| O(26)-K(1)-O(21)    | 57.35(13)  | O(1)-Mn(4)-O(8)     | 77.85(17)  |
| O(13)-K(1)-O(12')   | 85.2(8)    | O(29)-Mn(4)-O(8)    | 174.8(2)   |
| O(18)-K(1)-O(12')   | 125.1(8)   | O(2)-Mn(5)-O(21)    | 92.93(18)  |
| O(12)-K(1)-O(12')   | 20.6(7)    | O(2)-Mn(5)-O(26)    | 174.4(2)   |
| O(26)-K(1)-O(12')   | 133.6(7)   | O(21)-Mn(5)-O(26)   | 88.73(19)  |
| O(21)-K(1)-O(12')   | 167.4(6)   | O(2)-Mn(5)-O(3)     | 87.81(17)  |
| O(13)-K(1)-O(33)    | 115.8(11)  | O(21)-Mn(5)-O(3)    | 163.20(18) |
| O(18)-K(1)-O(33)    | 160.5(11)  | O(26)-Mn(5)-O(3)    | 92.16(18)  |
| O(12)-K(1)-O(33)    | 45.0(12)   | O(2)-Mn(5)-O(18)    | 87.64(19)  |
| O(26)-K(1)-O(33)    | 99.5(11)   | O(21)-Mn(5)-O(18)   | 91.22(18)  |
| O(21)-K(1)-O(33)    | 110.1(12)  | O(26)-Mn(5)-O(18)   | 86.93(19)  |
| O(12')-K(1)-O(33)   | 64.9(14)   | O(3)-Mn(5)-O(18)    | 105.58(17) |
| O(1)-Mn(1)-O(3)#1   | 108.9(9)   | O(2)-Mn(5)-O(7)#1   | 102.46(19) |
| O(1)-Mn(1)-O(3)#1   | 108.9(9)   | O(21)-Mn(5)-O(7)#1  | 83.65(18)  |
| O(1)-Mn(1)-O(1)#1   | 170.3(6)   | O(26)-Mn(5)-O(7)#1  | 83.07(19)  |
| O(1)-Mn(1)-O(4)#1   | 113.0(8)   | O(3)-Mn(5)-O(7)#1   | 79.81(17)  |
| O(3)#1-Mn(1)-O(4)#1 | 114.3(8)   | O(18)-Mn(5)-O(7)#1  | 168.85(18) |
| O(1)#1-Mn(1)-O(4)#1 | 72.9(6)    | O(15)-Mn(6)-O(24)   | 89.69(19)  |
| O(1)-Mn(1)-O(3)     | 74.1(7)    | O(15)-Mn(6)-O(1)    | 90.78(18)  |
| O(3)#1-Mn(1)-O(3)   | 170.4(6)   | O(24)-Mn(6)-O(1)    | 178.52(18) |
| O(1)#1-Mn(1)-O(3)   | 101.6(8)   | O(15)-Mn(6)-O(3)    | 179.10(19) |
| O(4)#1-Mn(1)-O(3)   | 71.6(6)    | O(24)-Mn(6)-O(3)    | 91.13(18)  |
| O(1)-Mn(1)-O(4)     | 71.0(6)    | O(1)-Mn(6)-O(3)     | 88.41(17)  |
| O(3)#1-Mn(1)-O(4)   | 69.6(6)    | O(15)-Mn(6)-O(20)   | 94.54(18)  |
| O(1)#1-Mn(1)-O(4)   | 102.2(6)   | O(24)-Mn(6)-O(20)   | 100.42(17) |
| O(4)#1-Mn(1)-O(4)   | 171.9(7)   | O(1)-Mn(6)-O(20)    | 78.15(15)  |
| O(3)-Mn(1)-O(4)     | 103.7(6)   | O(3)-Mn(6)-O(20)    | 85.67(16)  |
| O(11)-Mn(2)-O(3)    | 172.11(19) | O(15)-Mn(6)-O(28)   | 100.62(18) |
| O(11)-Mn(2)-O(25)   | 94.2(2)    | O(24)-Mn(6)-O(28)   | 94.97(18)  |
| O(3)-Mn(2)-O(25)    | 93.68(18)  | O(1)-Mn(6)-O(28)    | 86.32(16)  |
| O(11)-Mn(2)-O(4)#1  | 83.51(19)  | O(3)-Mn(6)-O(28)    | 78.94(16)  |
| O(3)-Mn(2)-O(4)#1   | 88.60(17)  | O(20)-Mn(6)-O(28)   | 158.41(16) |
| O(25)-Mn(2)-O(4)#1  | 176.23(18) | O(10)-Mn(7)-O(4)    | 164.6(2)   |
| O(11)-Mn(2)-O(28)   | 99.7(2)    | O(10)-Mn(7)-O(6)    | 90.9(2)    |
| O(3)-Mn(2)-O(28)    | 80.47(16)  | O(4)-Mn(7)-O(6)     | 78.94(17)  |
| O(25)-Mn(2)-O(28)   | 87.36(18)  | O(10)-Mn(7)-O(27)#1 | 96.3(2)    |
| O(4)#1-Mn(2)-O(28)  | 90.07(16)  | O(4)-Mn(7)-O(27)#1  | 94.87(17)  |
| O(11)-Mn(2)-O(7)#1  | 94.7(2)    | O(6)-Mn(7)-O(27)#1  | 171.3(2)   |

|                      |            |                       |            |
|----------------------|------------|-----------------------|------------|
| O(3)-Mn(2)-O(7)#1    | 86.50(19)  | O(10)-Mn(7)-O(11)#1   | 91.1(2)    |
| O(25)-Mn(2)-O(7)#1   | 82.69(19)  | O(4)-Mn(7)-O(11)#1    | 78.03(18)  |
| O(4)#1-Mn(2)-O(7)#1  | 100.46(18) | O(6)-Mn(7)-O(11)#1    | 93.1(2)    |
| O(28)-Mn(2)-O(7)#1   | 163.05(18) | O(27)#1-Mn(7)-O(11)#1 | 91.6(2)    |
| O(6)-Mn(3)-O(17)     | 94.04(19)  | O(22)-Mn(8)-O(5)      | 86.0(2)    |
| O(6)-Mn(3)-O(1)      | 171.95(18) | O(22)-Mn(8)-O(19)     | 139.22(18) |
| O(17)-Mn(3)-O(1)     | 93.56(18)  | O(5)-Mn(8)-O(19)      | 86.2(2)    |
| O(6)-Mn(3)-O(4)      | 81.90(18)  | O(22)-Mn(8)-O(2)      | 90.13(17)  |
| O(17)-Mn(3)-O(4)     | 175.92(18) | O(5)-Mn(8)-O(2)       | 175.5(2)   |
| O(1)-Mn(3)-O(4)      | 90.48(16)  | O(19)-Mn(8)-O(2)      | 98.24(16)  |
| O(6)-Mn(3)-O(20)     | 97.4(2)    | O(22)-Mn(8)-O(27)#1   | 145.51(18) |
| O(17)-Mn(3)-O(20)    | 87.47(19)  | O(5)-Mn(8)-O(27)#1    | 81.24(19)  |
| O(1)-Mn(3)-O(20)     | 80.33(16)  | O(19)-Mn(8)-O(27)#1   | 71.85(17)  |
| O(4)-Mn(3)-O(20)     | 92.62(16)  | O(2)-Mn(8)-O(27)#1    | 100.79(16) |
| O(6)-Mn(3)-O(8)      | 100.0(2)   | O(22)-Mn(8)-O(29)#1   | 92.43(18)  |
| O(17)-Mn(3)-O(8)     | 83.1(2)    | O(5)-Mn(8)-O(29)#1    | 105.7(2)   |
| O(1)-Mn(3)-O(8)      | 83.55(18)  | O(19)-Mn(8)-O(29)#1   | 128.17(18) |
| O(4)-Mn(3)-O(8)      | 97.93(19)  | O(2)-Mn(8)-O(29)#1    | 72.13(16)  |
| O(20)-Mn(3)-O(8)     | 160.79(18) | O(27)#1-Mn(8)-O(29)#1 | 61.02(17)  |
| O(2)#1-Mn(4)-O(23)#1 | 91.87(19)  | O(23)#1-Mn(4)-O(16)   | 89.76(19)  |
| O(2)#1-Mn(4)-O(16)   | 176.5(2)   | O(2)#1-Mn(4)-O(1)     | 88.12(17)  |

Symmetry transformations used to generate equivalent atoms: #1 -x+1,-y+1,-z+1

**Table S4. Bond-valence sums for the Mn and O<sup>a</sup> atoms of cluster 3**

| Atom | BVS  | Assigned oxidation state | Atom | BVS  | Group                                     |
|------|------|--------------------------|------|------|-------------------------------------------|
| Mn1  | 2.38 | +2                       | O3   | 1.95 | <i>t</i> -BuPO <sub>3</sub> <sup>2-</sup> |
| Mn2  | 2.82 | +3                       | O6   | 1.88 | <i>t</i> -BuPO <sub>3</sub> <sup>2-</sup> |
| Mn3  | 2.90 | +3                       | O7   | 1.97 | <i>t</i> -BuPO <sub>3</sub> <sup>2-</sup> |
| Mn4  | 2.93 | +3                       | O8   | 2.01 | <i>t</i> -BuPO <sub>3</sub> <sup>2-</sup> |
| Mn5  | 2.75 | +3                       | O9   | 1.91 | <i>t</i> -BuPO <sub>3</sub> <sup>2-</sup> |
| Mn6  | 2.91 | +3                       | O10  | 1.90 | <i>t</i> -BuPO <sub>3</sub> <sup>2-</sup> |
|      |      |                          | O11  | 1.91 | <i>t</i> -BuPO <sub>3</sub> <sup>2-</sup> |
|      |      |                          | O12  | 1.85 | <i>t</i> -BuPO <sub>3</sub> <sup>2-</sup> |
|      |      |                          | O13  | 1.97 | <i>t</i> -BuPO <sub>3</sub> <sup>2-</sup> |
|      |      |                          | O14  | 1.60 | <i>t</i> -BuPO <sub>3</sub> <sup>2-</sup> |
|      |      |                          | O15  | 2.05 | <i>t</i> -BuPO <sub>3</sub> <sup>2-</sup> |
|      |      |                          | O16  | 1.88 | <i>t</i> -BuPO <sub>3</sub> <sup>2-</sup> |
|      |      |                          | O17  | 1.85 | <i>t</i> -BuPO <sub>3</sub> <sup>2-</sup> |



|  |     |      |                                                  |
|--|-----|------|--------------------------------------------------|
|  | O18 | 1.86 | <i>t</i> -BuPO <sub>3</sub> <sup>2-</sup>        |
|  | O19 | 1.99 | <i>t</i> -BuPO <sub>3</sub> <sup>2-</sup>        |
|  | O21 | 1.1  | CH <sub>3</sub> CH <sub>3</sub> CHO <sup>-</sup> |
|  | O22 | 0.18 | H <sub>2</sub> O                                 |
|  | O23 | 0.42 | CH <sub>3</sub> OH                               |
|  | O24 | 0.24 | H <sub>2</sub> O                                 |

<sup>a</sup> BVS values for O atoms of RO<sup>-</sup>, ROH and H<sub>2</sub>O groups are typically 1.8–2.0, 1.0–1.2 and 0–0.2, respectively, but can be affected by hydrogen bonding.

**Table S5 Bond-valence sums for the Mn and O<sup>a</sup> atoms of cluster 4**

| Atom | BVS  | Assigned oxidation state | Atom | BVS  | Group                                          |
|------|------|--------------------------|------|------|------------------------------------------------|
| Mn1  | 1.64 | +2                       | O5   | 0.34 | H <sub>2</sub> O                               |
| Mn2  | 3.12 | +3                       | O6   | 2.22 | CH <sub>3</sub> O <sup>-</sup>                 |
| Mn3  | 3.22 | +3                       | O7   | 1.94 | C <sub>6</sub> H <sub>5</sub> COO <sup>-</sup> |
| Mn4  | 3.02 | +3                       | O8   | 2.01 | C <sub>6</sub> H <sub>5</sub> COO <sup>-</sup> |
| Mn5  | 3.03 | +3                       | O9   | 1.61 | C <sub>6</sub> H <sub>5</sub> COO <sup>-</sup> |
| Mn6  | 3.05 | +3                       | O10  | 2.02 | C <sub>6</sub> H <sub>5</sub> COO <sup>-</sup> |
| Mn7  | 3.11 | +3                       | O11  | 2.15 | CH <sub>3</sub> O <sup>-</sup>                 |
| Mn8  | 1.86 | +2                       | O12  | 0.02 | H <sub>2</sub> O                               |
|      |      |                          | O13  | 0.03 | H <sub>2</sub> O                               |
|      |      |                          | O14  | 0.04 | H <sub>2</sub> O                               |
|      |      |                          | O15  | 1.95 | <i>t</i> -BuPO <sub>3</sub> <sup>2-</sup>      |
|      |      |                          | O16  | 1.89 | <i>t</i> -BuPO <sub>3</sub> <sup>2-</sup>      |
|      |      |                          | O17  | 1.93 | <i>t</i> -BuPO <sub>3</sub> <sup>2-</sup>      |
|      |      |                          | O18  | 1.94 | <i>t</i> -BuPO <sub>3</sub> <sup>2-</sup>      |
|      |      |                          | O19  | 1.93 | <i>t</i> -BuPO <sub>3</sub> <sup>2-</sup>      |
|      |      |                          | O20  | 1.62 | <i>t</i> -BuPO <sub>3</sub> <sup>2-</sup>      |
|      |      |                          | O21  | 1.98 | <i>t</i> -BuPO <sub>3</sub> <sup>2-</sup>      |
|      |      |                          | O22  | 1.64 | <i>t</i> -BuPO <sub>3</sub> <sup>2-</sup>      |
|      |      |                          | O23  | 1.90 | <i>t</i> -BuPO <sub>3</sub> <sup>2-</sup>      |
|      |      |                          | O24  | 1.92 | <i>t</i> -BuPO <sub>3</sub> <sup>2-</sup>      |
|      |      |                          | O25  | 1.93 | <i>t</i> -BuPO <sub>3</sub> <sup>2-</sup>      |
|      |      |                          | O26  | 2.00 | <i>t</i> -BuPO <sub>3</sub> <sup>2-</sup>      |

|     |      |                                           |
|-----|------|-------------------------------------------|
| O27 | 1.97 | <i>t</i> -BuPO <sub>3</sub> <sup>2-</sup> |
| O28 | 1.87 | <i>t</i> -BuPO <sub>3</sub> <sup>2-</sup> |
| O29 | 1.76 | <i>t</i> -BuPO <sub>3</sub> <sup>2-</sup> |
| O33 | 0.04 | H <sub>2</sub> O                          |

<sup>a</sup> BVS values for O atoms of RO<sup>-</sup>, ROH and H<sub>2</sub>O groups are typically 1.8–2.0, 1.0–1.2 and 0–0.2, respectively, but can be affected by hydrogen bonding.

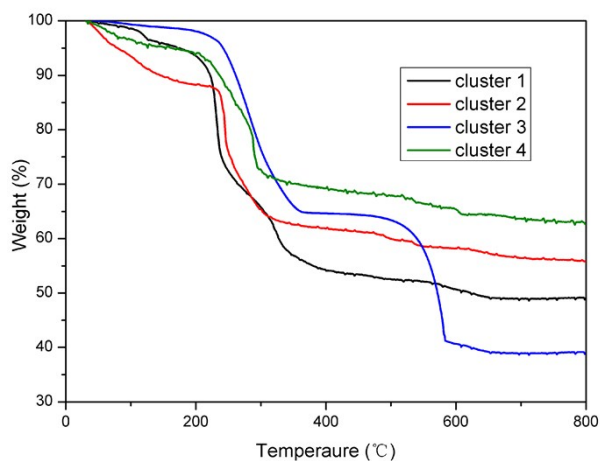

Figure S1. The TGA of cluster 1-4

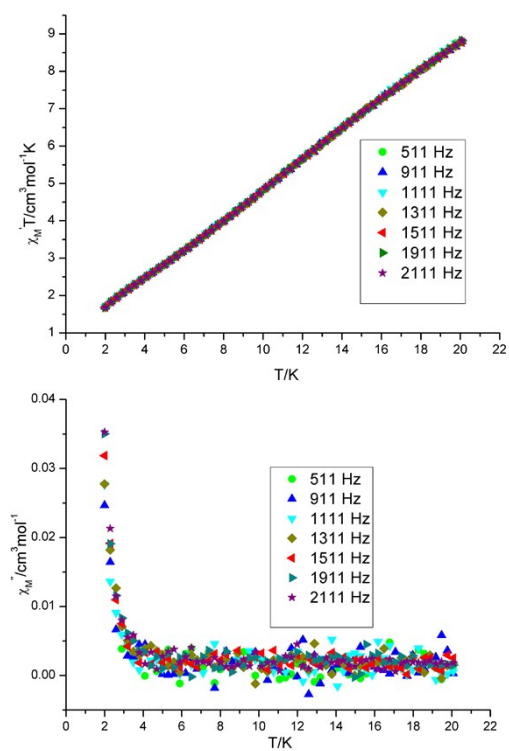

Figure S2. Ac susceptibility in-phase  $\chi' / M T$  (top) and out-of-phase  $\chi'' / M$  (bottom) signals of cluster 1 in a 3.0 G field oscillating at the indicated frequencies
